1 **Title: Formation of Phage Lysis Patterns and Implications on Co-**  
2 **Propagation of Phages and Motile Host Bacteria**

3

4

5 Xiaochu Li <sup>1,2¶</sup>, Floricel Gonzalez <sup>1¶</sup>, Nathaniel Esteves <sup>1</sup>, Birgit E. Scharf <sup>1\*</sup>, Jing Chen <sup>1\*</sup>

6

7 <sup>1</sup> Department of Biological Sciences, Virginia Polytechnic Institute and State University,

8 Blacksburg, VA, 24060

9 <sup>2</sup> BIOTRANS Graduate Program, Virginia Polytechnic Institute and State University,

10 Blacksburg, VA, 24060

11

12 \* Corresponding authors: Email: [chenjing@vt.edu](mailto:chenjing@vt.edu) (J.C.); [bscharf@vt.edu](mailto:bscharf@vt.edu) (B.E.S.)

13

14 ¶ These authors contributed equally to this work.

## 15 **Abstract**

16           Coexistence of bacteriophages, or phages, and their host bacteria plays an important role  
17 in maintaining the microbial communities. In natural environments with limited nutrients, motile  
18 bacteria can actively migrate towards locations of richer resources. Although phages are not  
19 motile themselves, they can infect motile bacterial hosts and spread in space via the hosts.  
20 Therefore, in a migrating microbial community coexistence of bacteria and phages implies their  
21 co-propagation in space. Here, we combine an experimental approach and mathematical  
22 modeling to explore how phages and their motile host bacteria coexist and co-propagate. When  
23 lytic phages encountered motile host bacteria in our experimental set up, a sector-shaped lysis  
24 zone formed. Our mathematical model indicates that local nutrient depletion and the resulting  
25 inhibition of proliferation and motility of bacteria and phages are the key to formation of the  
26 observed lysis pattern. The model further reveals the straight radial boundaries in the lysis  
27 pattern as a tell-tale sign for coexistence and co-propagation of bacteria and phages. Emergence  
28 of such a pattern, albeit insensitive to extrinsic factors, requires a balance between intrinsic  
29 biological properties of phages and bacteria, which likely results from co-evolution of phages  
30 and bacteria.

## 31 **Author summary**

32           Coexistence of phages and their bacterial hosts is important for maintaining the microbial  
33 communities. In a migrating microbial community, coexistence between phages and host  
34 bacteria implies that they co-propagate in space. Here we report a novel phage lysis pattern that  
35 is indicative of this co-propagation. The corresponding mathematical model we developed  
36 highlights a crucial dependence of the lysis pattern and implied phage-bacteria co-propagation on  
37 intrinsic properties allowing proliferation and spreading of the microbes in space. Remarkably,  
38 extrinsic factors, such as overall nutrient level, do not influence phage-bacteria coexistence and  
39 co-propagation. Findings from this work have strong implications for dispersal of phages  
40 mediated by motile bacterial communities, which will provide scientific basis for the fast-  
41 growing applications of phages.

## 42 **Introduction**

43 Viruses that specifically target bacteria, bacteriophages or phages, are critical  
44 components of the microbial world. They are found in almost every natural environment,  
45 including soil, waters, oceans, and bodies of macroorganisms (e.g., human guts) [1-3].  
46 Furthermore, they are the most abundant organisms in the biosphere [2]. Through their  
47 interactions with bacteria, phages constantly regulate the ecology, evolution, and physiology of  
48 microbial communities [1,2]. Because of their antimicrobial activity, the application of phages in  
49 food processing, agriculture, and medicine has exploded in recent years [4-6]. Development of  
50 these applications benefits from fundamental knowledge about how phages interact with bacteria  
51 in a microbial community and how they are dispersed in their microenvironment.

52 As obligate parasites of bacteria, phages must coexist with their hosts at the population  
53 level [1]. This coexistence, however, appears rather inconceivable because phages have a huge  
54 proliferative advantage over bacteria. The generation cycles of phage and bacteria fall in  
55 comparable time frames, with both the phage latent period and bacterial division cycle on the  
56 order of an hour [7]. But in each generation cycle a bacterium produces two daughter cells, while  
57 one phage produces ~100 new phage particles. Thus, it would follow that phages would quickly  
58 outnumber and annihilate the host bacterial population [8,9]. However, phages and bacteria have  
59 coexisted in natural environments for eons. Recent theoretical and experimental studies  
60 demonstrated that the evolutionary arms race could maintain coexistence of phages with host  
61 bacteria [10-13]. Coevolution could drive a phenotypic and genotypic diversity in the ability of  
62 phages to attack the bacteria and the ability of bacteria to resist the attacks, thereby maintaining  
63 the balance between phages and host bacteria [10,14-16]. However, for a successful evolutionary  
64 arms race, phages and bacteria need to coexist at least over the time scale required for the

65 emergence of beneficial mutations [8,9]. It is therefore critical to understand the population  
66 dynamics of phage-bacteria systems and conditions for their coexistence below the evolutionary  
67 time scale.

68 Previous studies on coexistence of phages and bacteria mostly focused on well-mixed,  
69 nearly homeostatic systems, such as cultures grown in chemostats [17-23]. Naturally occurring  
70 systems of phages and bacteria, however, often do not satisfy the conditions found under these  
71 defined laboratory settings. Firstly, natural systems typically do not offer a constant  
72 environment. Unlike chemostats, where steady levels of nutrients and waste are maintained,  
73 natural systems often experience sporadic deposition and replenishing of resources, and  
74 fluctuations in other conditions. Secondly, natural systems usually exhibit spatial heterogeneity  
75 to various degrees. The spatial inhomogeneity can significantly impact dynamical coexistence in  
76 the phage-bacteria systems [8,9,24-26].

77 A critical spatial process in the phage-bacteria system is the migration of bacteria and  
78 phages. Many motile bacteria can migrate towards nutrient-enriched areas via chemotaxis.  
79 Phages themselves are not motile, so their dispersal relies on either passive diffusion or transport  
80 by their hosts. However, diffusion is very inefficient for covering long distances. In addition,  
81 diffusion of phage particles is typically reduced by higher bacterial densities and increased  
82 viscosities due to bacterial exopolysaccharide production in biofilms [27-29]. Therefore, spatial  
83 dispersal of phages mostly relies on infection of and transportation by their motile host bacteria.  
84 It is poorly understood how phages and bacteria in a constantly migrating microbial community  
85 achieve coexistence, which implies their co-propagation in space.

86 In this work we explored the co-propagation of phages and motile bacteria using a simple  
87 experimental design, in which phages and bacteria were co-inoculated in a soft agar nutrient

88 medium [30] (Fig 1a). The low agar concentration enabled motile bacteria to swim through the  
89 matrix, which, in combination with bacterial growth, resulted in the formation of visible “swim  
90 rings” [30]. Inoculation of bacteria and phages in separate locations allowed the experimental  
91 setup to mirror realistic scenarios, in which expanding bacterial populations encounter phages in  
92 a spatial domain. The described experiment generated a highly reproducible sector-shaped lysis  
93 pattern. This pattern cannot be explained by any previous mathematical models describing phage  
94 plaque formation [31-36], which inevitably produce circular patterns. Here we constructed a new  
95 mathematical model for the spatial dynamics of phages and bacteria, which reproduced the  
96 observed lysis pattern and revealed local nutrient depletion as the key to formation of the lysis  
97 pattern. Moreover, our model revealed that the sector-shaped lysis pattern with straight radial  
98 boundaries requires a balance between intrinsic biological properties of phages and bacteria, but  
99 does not depend on extrinsic factors. Such a pattern was further shown to be a tell-tale sign for  
100 extended spatial co-propagation of phages and bacteria, implying dependence of co-propagation  
101 on intrinsic balance between phages and bacteria. This is the first time that a sector-shaped lysis  
102 pattern has been reported in phage-bacteria systems. Our study of this phenomenon via an  
103 integrated modeling and experimental approach provides critical insights into naturally occurring  
104 dispersal and cohabitation of phages infecting motile bacteria.

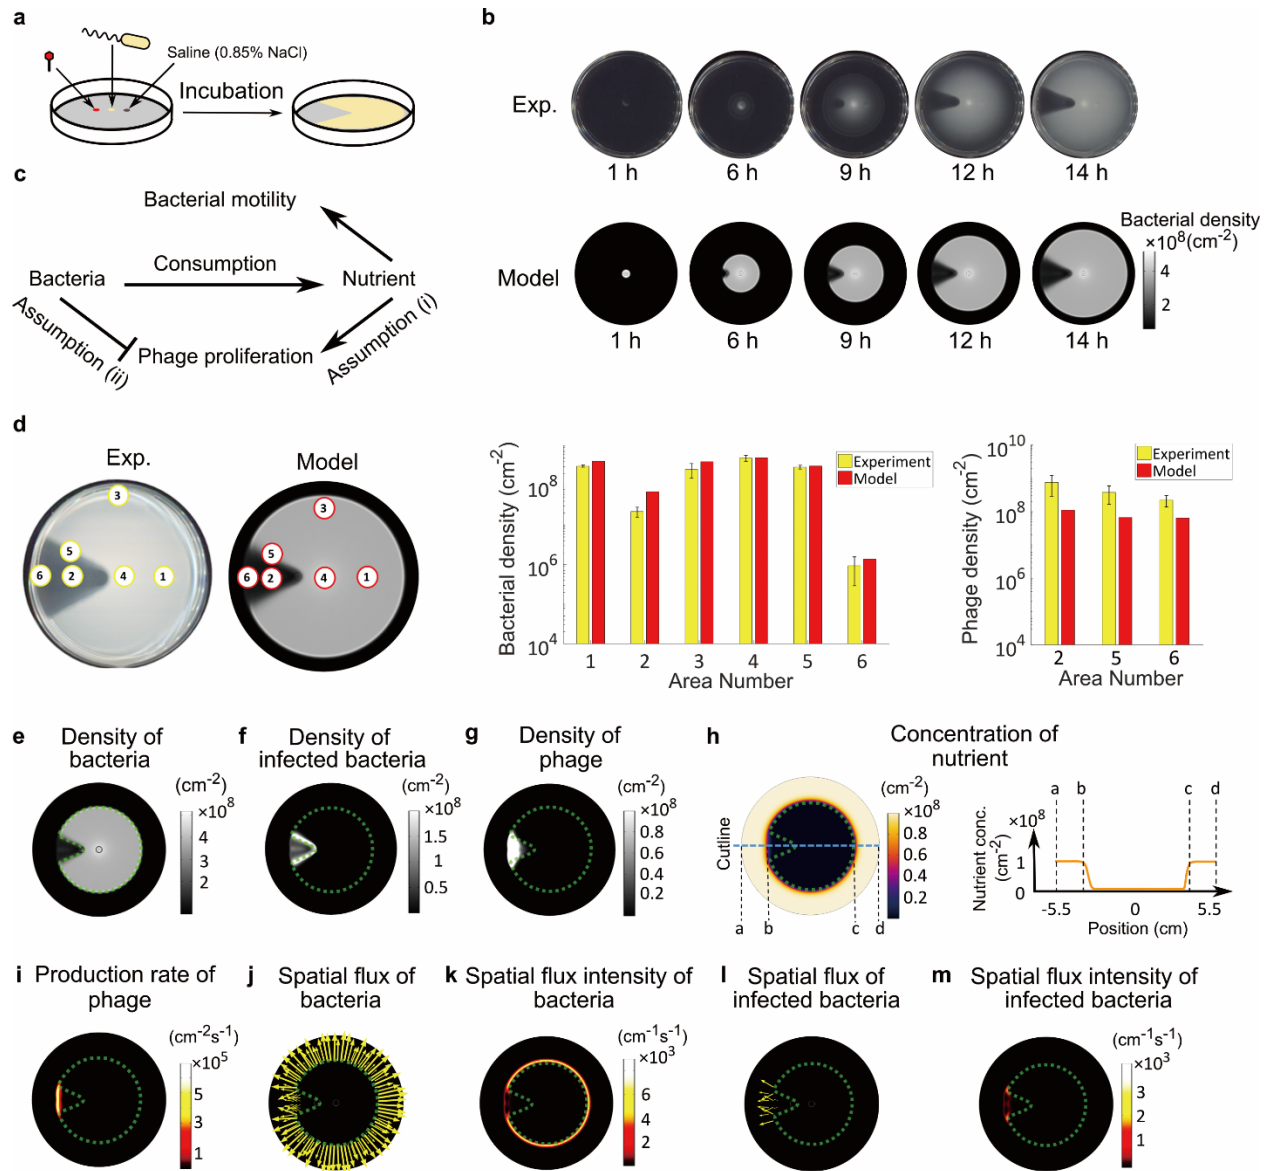

105

106 **Figure 1. Sector-shaped lysis patterns emerge due to nutrient depletion.** (a) Schematic of  
 107 experimental procedure. Bacteria, phages, and a saline control were spotted on swim plates and incubated  
 108 for 14 hours, which resulted in the development of the sector-shaped lysis pattern. (b) Experimental and  
 109 model results of the lysis pattern over time. (c) Interactions between key processes in the model. Pointed  
 110 arrows: positive influences. Blunt arrows: negative influences. (d) Quantitative comparison of bacterial  
 111 and phage densities between experiment (yellow bars) and model (red bars). In the experiment, areas  
 112 labeled by yellow numbers were sampled for phage and bacteria quantifications (see Methods).

113 Corresponding areas in the model are labeled by red numbers. (e) Simulated density of total bacteria. The

114 dashed green outline of the bacteria-dense area is superimposed on (f-m) for reference. (f) Simulated  
115 density of infected bacteria. (g) Simulated density of phages. (h) Simulated nutrient concentration (per  
116 unit area). Right: Orange curve shows the nutrient concentration profile along the axis of symmetry of the  
117 lysis pattern (blue dashed line in left panel). (i) Simulated phage production rate. Active phage production  
118 only happens at the outer edge of the lysis area. (j) Simulated spatial flux of total bacteria. (k) Intensity of  
119 bacterial spatial flux (~ length of arrow in (j)). Bacteria are motile only at the outer edge of the swim ring.  
120 (l) Simulated spatial flux of infected bacteria. (m) Intensity of spatial flux of infected bacteria (~ length of  
121 arrow in (l)). Infected bacteria are only motile at the outer edge of the lysis area. The spatial flux shown in  
122 (j-m) represents the sum of diffusion flux and chemotaxis flux. Length of the arrow is proportional to  
123 magnitude of the spatial flux. (e-m) present snapshots of model simulation at 10 h, an intermediate time at  
124 which the colony expansion and pattern formation progress steadily.

125

## 126 **Results**

### 127 **Nutrient depletion is critical for formation of the lysis pattern**

128 We designed a series of quantitative experiments based on our previously described  
129 phage drop assay [41], which allowed a spatially propagating bacterial population to encounter  
130 phages. *Salmonella enterica* serovar typhimurium 14028s and  $\chi$  phage were inoculated 1 cm  
131 apart (Fig 1a) on 0.3% agar plate containing bacterial growth medium [30,42]. As the bacterial  
132 population grew, nutrients were consumed. Due to the low agar concentration, bacteria swam  
133 through the matrix and followed the self-generated nutrient gradient via chemotaxis, causing  
134 spreading of the bacterial population and the appearance of a swim ring. As the bacterial swim  
135 ring expanded, it reached the phage inoculation point. The phages then infected the bacteria and  
136 generated a lysis area with low bacterial density in the swim ring (Fig 1b). This experiment gave  
137 rise to an intriguing sector-shaped lysis pattern (Fig 1b). Most strikingly, as the bacterial swim



138 ring expanded, the radial boundaries of the lysis area stayed unchanged behind the expanding  
139 front, resulting in a frozen or immobilized lysis pattern (Fig 1b, S1 Movie). Once the spreading  
140 of the swim ring stopped at the plate wall, the lysis pattern persisted for at least 48 hours (data  
141 not shown).

142 To understand the formation of this lysis pattern, we constructed a mean-field partial  
143 differential equation (PDE) model for the phage-bacteria system (Eqs.(1) ~ (4)). Like the  
144 previous phage plaque models [31-36], our model depicted the basic processes underlying the  
145 proliferation and propagation of phages and bacteria. Namely, the bacteria consume nutrients,  
146 divide, and move up the nutrient gradient via chemotaxis-directed swimming motility. Once  
147 infected by phages, the bacterium is lysed after a latent period, and release new phage progeny.  
148 Note that the run-and-tumble mechanism of bacterial chemotaxis results in a biased random walk  
149 of cells up the nutrient gradient. The random walk was expressed in the model as the cell  
150 diffusion terms and the bias as the cell drift terms (Eqs.(1) and (2)). In addition, we incorporated  
151 the following new assumptions about phage-bacteria interactions in the model, which were  
152 critical elements for formation of the sector-shaped lysis pattern (S1 Fig).

153 (i) Nutrient deficiency inhibits phage replication (Fig 1c). Because phage replication in  
154 the host bacteria requires energy, it is likely reduced at low nutrient levels.

155 (ii) High bacterial density inhibits phage production (Fig 1c). Such an effect has  
156 previously been implied in *Escherichia coli* and phage  $\lambda$  [43]: *E. coli* cells reduce the number of  
157 phage receptors in response to externally applied quorum sensing signals, resulting in decrease of  
158 phage adsorption rate and ultimately overall phage production.

159 Our model was able to reproduce the lysis pattern observed in the phage drop assay (Fig  
160 1b, S1 Movie) and quantitatively match the bacterial and phage density profiles throughout

161 different areas of the agar plate (Fig 1d). Both, experimental and modeling results, displayed the  
162 highest bacterial density at the inoculation point (area 4), followed by areas outside the lysis  
163 sector (areas 1 and 3), the radial boundary of the lysis pattern (area 5), and in the middle of the  
164 lysis pattern (area 2). The lowest bacterial density was at the outer edge of the lysis sector (area  
165 6). The predicted phage densities also matched the experimental values, with the highest number  
166 of phages localized in the middle of the lysis sector and the lowest number present at the edge of  
167 the swim ring near the wall of the plate (Fig 1d). It should be noted that the lysis area was not  
168 entirely void of bacteria. In both experimental and modeling results, a low density of bacteria  
169 remained within the lysis area. In the model, nearly all bacteria in this area were infected bacteria  
170 (Fig 1e & f). In reality, this subpopulation could also include phage-resistant bacteria, which was  
171 not encompassed in our current model.

172         The model results revealed local nutrient depletion as the key reason for the lysis pattern  
173 to immobilize behind the expanding front of the bacterial swim ring. As the swim ring expanded,  
174 nutrients were depleted within the ring (Fig 1h). Nutrient depletion inhibited both phage  
175 production (Fig 1i) and bacterial motility (Fig 1j-m). Note that phages relied on the infection of  
176 motile bacteria to propagate in space. The passive diffusion of phage particles ( $D_p \sim 1 \mu m^2 h^{-1}$ )  
177 was negligible compared to the effective diffusion of bacteria resulting from run-and-tumble  
178 ( $D_B \sim 10^5 \mu m^2 h^{-1}$ ) (Table 1). Therefore, inhibition of bacterial motility, especially motility of  
179 the infected bacteria (Fig 1l & m), also hindered spatial propagation of phages. Together, the  
180 inhibition of phage production and propagation due to local nutrient depletion and reduction of  
181 bacterial motility resulted in immobilization of the lysis pattern at the interior of the bacterial  
182 swim ring. The lysis pattern only actively grew at the expanding front of the swim ring, where

183 nutrient supply from the unoccupied periphery supported active phage production and  
 184 propagation (Fig 1i-m).

185 **Table 1:** Parameters of mathematical model.

| Symbols    | Meaning                                                                                                                                                    | Default values                                | Sources                                                                                              |
|------------|------------------------------------------------------------------------------------------------------------------------------------------------------------|-----------------------------------------------|------------------------------------------------------------------------------------------------------|
| $D_{Bmax}$ | Maximum diffusion coefficient of bacterial population (effective diffusion coefficient when bacteria assume maximum motility, see Supplementary Materials) | $5.25 \times 10^5 \mu\text{m}^2\text{h}^{-1}$ | Estimated from cell velocity and tumbling frequency [44,53]                                          |
| $K_c$      | Nutrient level for half maximum cell motility                                                                                                              | $0.02 \mu\text{m}^{-2}$                       | Fitting to experimental data *                                                                       |
| $\alpha_c$ | Chemotactic efficiency (see Supplementary Material)                                                                                                        | 2                                             | Fitting to experimental data *                                                                       |
| $D_p$      | Diffusion coefficient of phage particles                                                                                                                   | $1 \mu\text{m}^2\text{h}^{-1}$                | Particle size $\sim 0.1$ or $0.05 \mu\text{m}$ ; diffusion coefficient $\sim 1/\text{particle size}$ |
| $D_n$      | Diffusion coefficient of nutrient                                                                                                                          | $4.5 \times 10^6 \mu\text{m}^2\text{h}^{-1}$  | [54]                                                                                                 |
| $\eta$     | Phage adsorption rate constant                                                                                                                             | $8 \times 10^4 \mu\text{m}^2\text{h}^{-1}$    | [55,56]                                                                                              |
| $\beta$    | Phage burst size                                                                                                                                           | 80                                            | [57]                                                                                                 |
| $k_l$      | Lysis rate constant of infected bacteria ( $\sim$ reciprocal of latency period)                                                                            | $2 \mu\text{m}^{-2}\text{h}^{-1}$             | [56,58]                                                                                              |
| $g_{max}$  | Maximum division rate of bacteria                                                                                                                          | $6 \text{h}^{-1}$                             | Fitting to experimental data *                                                                       |
| $K_n$      | Half-saturation nutrient concentration for Monod growth law                                                                                                | $0.1 \mu\text{m}^{-2}$                        | Fitting to experimental data *                                                                       |
| $\lambda$  | Bacterial growth yield (ratio between quantity of produced bacteria and quantity of consumed nutrient)                                                     | 0.2                                           | Fitting to experimental data *                                                                       |
| $K_b$      | Bacteria density for half maximum phage adsorption rate                                                                                                    | $0.1 \mu\text{m}^{-2}$                        | Fitting to experimental sector-shaped lysis pattern                                                  |
| $B_0$      | Number of inoculated bacteria                                                                                                                              | $1 \times 10^7$                               | Experimental setup                                                                                   |
| $P_0$      | Number of inoculated phages                                                                                                                                | $1.5 \times 10^8$                             | Experimental setup                                                                                   |
| $n_0$      | Initial area density of nutrient                                                                                                                           | $1 \mu\text{m}^{-2}$                          | Normalized ( $K_c$ , $K_n$ and $\lambda$ scale with $n_0$ )                                          |
| $r$        | Radius of inoculation circle of bacteria and phage                                                                                                         | 0.25 cm                                       | Experimental setup                                                                                   |
| $R$        | Radius of plate                                                                                                                                            | 5.5 cm                                        | Experimental setup                                                                                   |

186 \* Fitting to experimentally observed expansion rate of bacterial swim ring.

187

188 **The lysis pattern reflects radial projection of phage initiation zone**

189            Interestingly, the experiment presented a decrease in the angle of the lysis sector when  
190 phages were inoculated further away from the bacterial inoculation point and vice versa (Fig 2a).  
191 This observation was faithfully reproduced by our model (Fig 2a). The lysis patterns in these  
192 cases approximately reflected the radial projection from the bacterial inoculation point over an  
193 approximately 0.7 cm circle centered at the phage inoculation point (Fig 2a, cartoon). In the  
194 model, we found that this projected area roughly corresponded to the area occupied by phages  
195 when nutrients initially got depleted at the phage inoculation point (Fig 2a, 3<sup>rd</sup> and 4<sup>th</sup> rows,  
196 nutrient depleted to 5 % of initial level). We hereby termed this area the “phage initiation zone”.  
197 The phage initiation zone marked the initialization of the steady expansion of the lysis pattern.  
198 After the phage initiation zone was established, the phage and bacterial densities at the  
199 expanding front remained at a steady level throughout the rest of the pattern formation (S2 Fig).

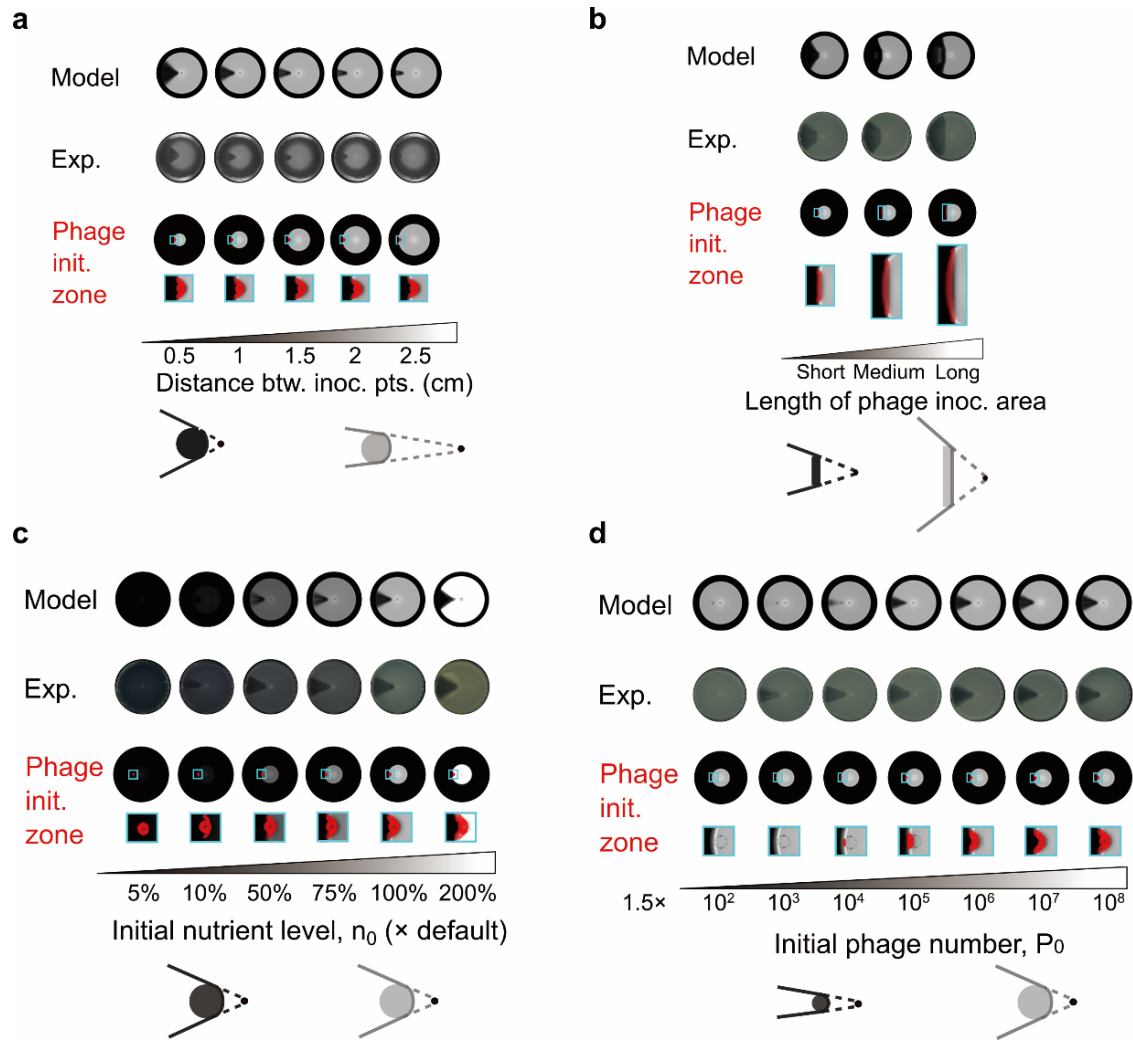

200

201 **Figure 2. The lysis pattern reflects the radial projection of the phage initiation zone and is**  
 202 **insensitive to extrinsic factors.** Model and experimental results with (a) phages inoculated at different  
 203 distances from the bacterial inoculation point, (b) phages inoculated with rods of different lengths, (c)  
 204 different initial nutrient levels, and (d) different initial phage number. In (a-d), the phage initiation zones  
 205 represent areas occupied by phages when the nutrient level at the center of the phage inoculation area  
 206 drops below a certain threshold (set at 5 % of the initial nutrient level in model simulations). Cartoons  
 207 summarize factors leading to different lysis patterns. Black dots: bacterial inoculation point. Solid dark  
 208 grey and light grey areas: illustrative phage initiation zones. Solid lines: radial boundaries of lysis  
 209 patterns. Dashed lines: extension from bacterial inoculation points to boundaries of the lysis areas.

210

211 Our model further predicted how the phage initiation zone and the projected lysis pattern  
212 rely on additional factors. The predictions were all confirmed by experiments (Fig 2). Firstly, the  
213 phage initiation zone encompassed the original phage inoculation area (Fig 2a & b). Particularly,  
214 when phages were inoculated with rods that were significantly longer than the size of the phage  
215 initiation zone during point inoculation, the phage initiation zone became dominated by the rod  
216 size, and the lysis pattern roughly reflected the radial projection of the phage inoculation area  
217 (Fig 2b). Secondly, the size of the phage initiation zone remained roughly the same despite  
218 changes in total nutrient concentrations, resulting in similar angles of the lysis sector (Fig 2c).  
219 Thirdly, the phage initiation zone enlarged as initial phage particle number increased, resulting in  
220 a larger angle in the lysis sector (Fig 2d). Lower phage inoculation density led to decreased  
221 phage production and propagation by the time nutrient got depleted locally by bacteria. When  
222 initial phage numbers were too low, phages failed to establish the initiation zone, and  
223 subsequently, the lysis sector (Fig 2d,  $P_0 = 1.5 \times 10^2$ ). The model also predicted that the initial  
224 bacteria number does not affect the lysis pattern (S3 Fig). Remarkably, the lysis pattern  
225 maintained straight radial boundaries (Fig 2) despite changes in the extrinsic factors tested  
226 above, i.e., distance between inoculation point, size of inoculation area, overall nutrient level,  
227 and initial phage/bacteria number.

228

### 229 **Competition between phages and bacteria determines shape of lysis pattern**

230 Although the straight radial boundaries of the lysis pattern were maintained under various  
231 external conditions like nutrient level and initial inoculation, our model predicted a significant  
232 change in the lysis pattern when intrinsic biological parameters were altered. In the simulation  
233 results, promoting the proliferative efficiency of phages (e.g., by increasing phage adsorption

234 rate, phage burst size and lysis rate of infected bacteria) caused the lysis pattern to flare out, and  
 235 decreasing phage proliferation caused the lysis pattern to close up (Fig 3, horizontal axes).  
 236 Meanwhile, promoting bacterial proliferation caused the lysis pattern to curve inward and close  
 237 up, and vice versa (Fig 3, vertical axes). In detail, the model assumed dependence of both  
 238 bacterial and phage proliferation on nutrient (both are increasing functions of local nutrient  
 239 concentration, see Materials and Methods). As previously shown, proliferation of bacteria caused  
 240 nutrient to be depleted inside the bacterial swim ring (Fig 1h). Therefore, the bacterial  
 241 proliferation rate at the expanding front determined how fast nutrients were depleted locally.  
 242 This time further determined angular spreading of phages along the expanding front of the swim  
 243 ring, because phage proliferation only thrived before nutrient was depleted locally. Therefore,  
 244 either stronger phage proliferation or a weaker bacterial proliferation (causing slower nutrient  
 245 consumption) allowed phages to spread in an accelerated fashion as the swim ring expanded,  
 246 resulting in a flared-out lysis pattern. Vice versa, a weaker phage proliferation relative to  
 247 bacterial proliferation resulted in a lysis pattern with edges closing inwards. The experimentally  
 248 observed sector-shaped lysis pattern maintained straight radial boundaries despite changes in  
 249 extrinsic variables, indicating that this observed pattern stemmed from a balance between  
 250 proliferation of the bacterial and phage strains tested.

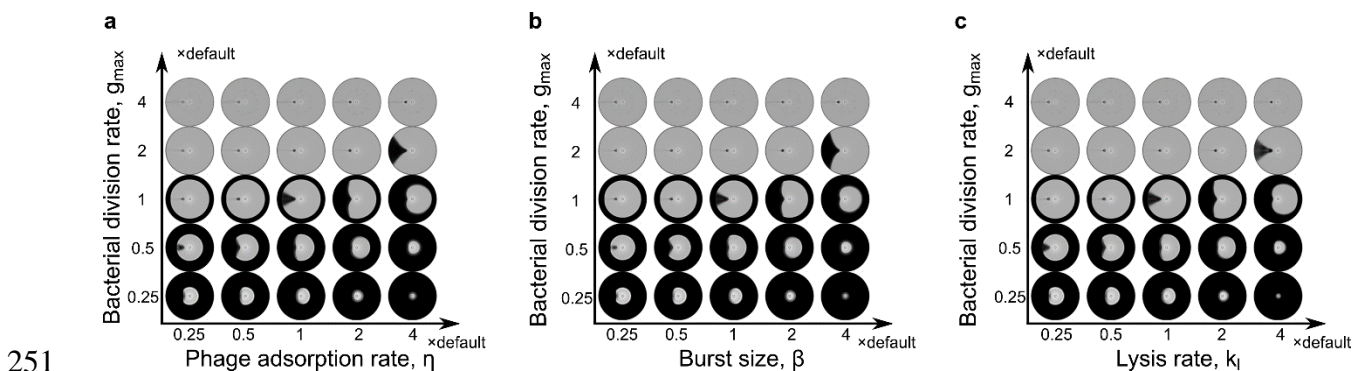

252 **Figure 3. Competition between bacterial and phage proliferation determines the shape of lysis**

253 **patterns.** Simulated lysis patterns with various bacterial growth rate constants versus (a) phage

254 adsorption rate constants, (b) phage burst sizes, and (c) phage-induced lysis rate constants.

255

256 **Bacterial motility and chemotaxis affects the lysis pattern**

257 We next used the model to investigate how bacterial motility and chemotaxis influenced

258 the shape of the lysis pattern. Bacterial motility was reflected by the bacterial diffusion

259 coefficient in the model. A larger diffusion coefficient corresponds to higher cell speed [44].

260 Expectedly, a larger diffusion coefficient caused faster expansion of the bacterial swim ring in

261 the model (Fig 4a). The chemotactic efficiency, on the other hand, characterized the bias of

262 diffusion. Chemotaxis promoted the directed motility of bacteria in the radial direction due to the

263 nutrient gradient formed by bacterial nutrient consumption (Fig 1h). Consistently, the model

264 predicted that higher chemotactic efficiency expedites expansion of the bacterial swim ring (Fig

265 4a), because the moving cells at the expanding front can follow the nutrient gradient more

266 efficiently.



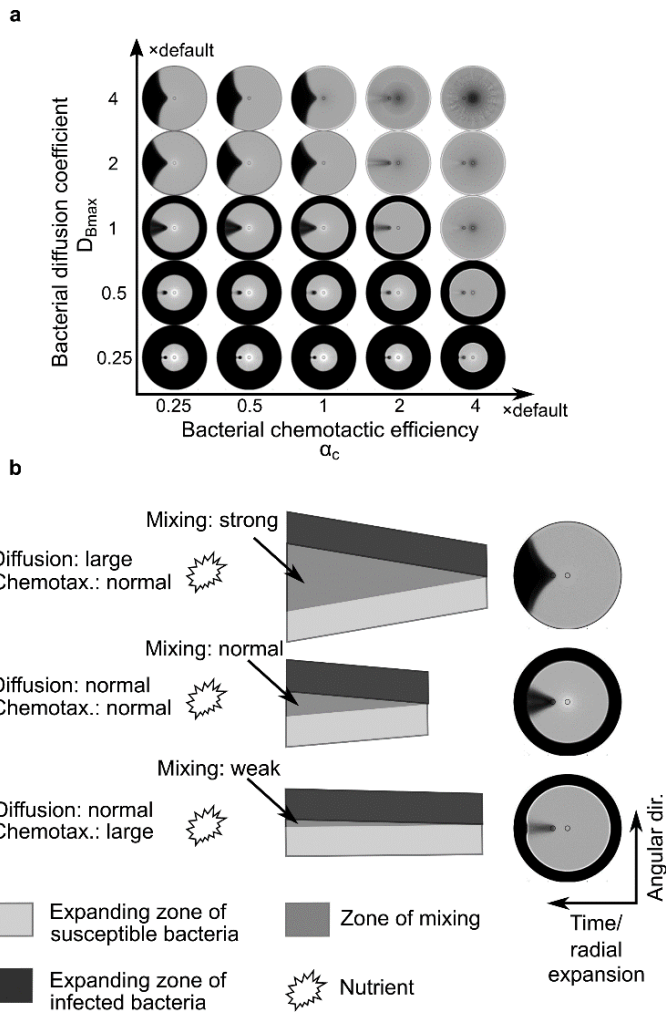

267

268 **Figure 4. Effects of bacterial motility and chemotaxis on the shape of lysis patterns.** (a) Simulated

269 lysis patterns with various bacterial diffusion coefficients and chemotactic efficiencies. The diffusion

270 coefficient in the model reflects the efficiency of bacterial motility. (b) Illustration of how bacterial

271 diffusion and chemotaxis affect the evolution of lysis patterns. The cartoon illustrates a hypothetical

272 history of expansion and mixing of two bacterial patches that would occur along the expanding front of

273 the swim ring. Dark and light grey patch starts with infected and susceptible bacteria, respectively.

274 Because nutrient is depleted behind the expanding front, bacterial expansion along the radial axis only

275 occurs in the outward direction. Large bacterial diffusion promotes expansion equally in all directions,

276 which enhances mixing between the infected and susceptible bacteria and leads to more effective phage

277 propagation and flare-out of the lysis pattern (top row). In contrast, large chemotactic efficiency promotes

278 expansion only against the nutrient gradient (radial direction), which effectively parallelizes bacterial  
279 motion, reduces their mixing in the angular direction, and causes the lysis pattern to close up (bottom  
280 row).

281  
282         The effects of bacterial motility and chemotactic efficiency on the lysis pattern, however,  
283 were predicted to be exactly opposite to each other. According to the simulation results,  
284 increasing the bacterial diffusion coefficient or decreasing the chemotactic efficiency caused the  
285 pattern to flare out (Fig 4a). Vice versa, decreasing the bacterial diffusion coefficient or  
286 increasing chemotactic efficiency caused the pattern to close up (Fig 4a). The model generated  
287 this result because increasing bacterial diffusion coefficient, i.e., increasing bacterial motility,  
288 promoted mixing of infected and susceptible bacteria (Fig 4b, top row). Such mixing was critical  
289 for spatial propagation of phages and angular expansion of the lysis pattern, because phages  
290 could not move on their own and relied on infected bacteria to spread in space. In contrast,  
291 enhancing chemotaxis inhibited such mixing, because it effectively promoted parallel motion of  
292 the bacteria along the radial direction towards the high-nutrient area outside the swim ring (Fig  
293 4b, bottom row). Taken together, bacterial motility and chemotaxis needed to be in balance to  
294 generate a lysis pattern with straight radial boundaries. Collectively, these findings and those  
295 from the model in the previous section indicated that bacterial motility and chemotaxis are  
296 required to be in balance with bacterial and phage proliferation rate to generate straight radial  
297 boundaries in the lysis pattern (S4 Fig).

298         To test the model predictions, we performed the phage drop assay with strains of *S.*  
299 typhimurium 14028s containing deletions in two chemoreceptor encoding genes, *tar* and *tsr*.  
300 Strains with deletions in *tar* or *tsr* did not significantly change the lysis pattern, whereas the  
301 strain containing a deletion of both genes produced a moderate flare-out of the lysis pattern (S5

302 Fig). This result was qualitatively consistent with the model prediction that weaker chemotactic  
303 efficiency caused a pattern with a wider angle (Fig 4a).

304

305 **Straight radial boundary of lysis pattern is a tell-tale sign for extended co-**  
306 **propagation**

307 A closer look at the model results revealed that the straight lysis pattern boundaries in the  
308 lysis pattern implied co-propagation of bacteria and phages over extended periods. Unlike the  
309 sector-shaped pattern with straight radial boundaries, a flared-out or closed-up lysis pattern  
310 indicated that one species would outcompete the other during the co-propagation (Fig 5a). For  
311 example, the result at the upper right corner of Fig 5a shows a case where phages encircled  
312 bacteria and blocked their further propagation in space. Vice versa, the result at the lower left  
313 corner of Fig 5a shows the opposite case where phage propagation was blocked by bacteria. For  
314 the less extreme flared-out or closed-up lysis patterns (e.g. upper left and lower right corners of  
315 Fig 5a), one species would eventually encircle and block the other, if the simulation had been run  
316 on a larger spatial domain that allowed further spatial expansion.

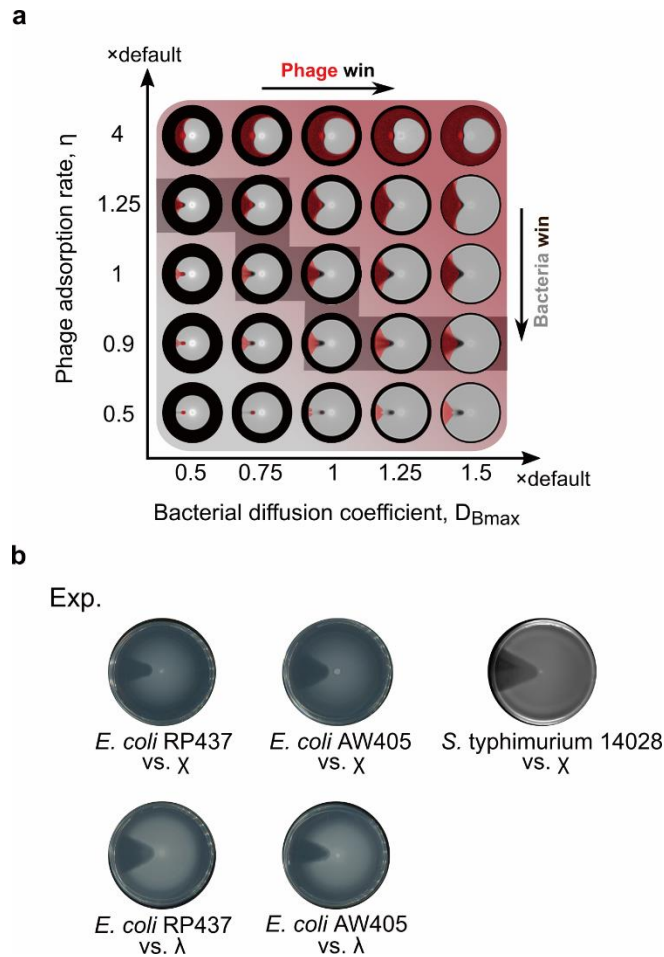

317

318 **Figure 5. Co-propagation between phage and bacteria is reflected by the straight radial boundary**

319 **of lysis pattern.** (a) Lysis patterns and corresponding distribution of phages with various bacterial

320 diffusion coefficients and phage adsorption rate constants. Red shade: density of phages. Grey shade:

321 density of bacteria. Grey shadow staircase: potential trajectory of evolutionary arms race. (b)

322 Experimental results from pairs of different bacterial species and their cognate phages.

323

324 Remarkably, similar sector-shaped lysis patterns with straight radial boundaries were

325 observed in different bacteria-phage pairs (Fig 5b). First, we performed the phage drop assay

326 using *E. coli* and phage  $\chi$ , and found a similar sector-shaped lysis pattern (Fig 5b, first row).

327 Since  $\chi$  is a bacterial flagella-dependent phage [45-47], we further examined whether infection of

328 motile *E. coli* by a non-flagellotropic phage,  $\lambda$ , would generate a similar lysis pattern. Phage  $\lambda$

329 was chosen because of an overlapping bacterial host range with  $\chi$ . Interestingly, similar sector-  
330 shaped lysis patterns were observed independent of the utilized phage type (Fig 5b). Combined  
331 with the model findings above and earlier results on sensitivity of the pattern to intrinsic  
332 parameters, these highly similar sector-shaped lysis patterns indicated that both *Salmonella* and  
333 *E. coli* achieved intrinsic biological balance with both phages,  $\lambda$  and  $\chi$ .

334

## 335 **Discussion**

336 In this work, we combined experiments and modeling of lysis pattern formation to  
337 investigate the coexistence and co-propagation of phages and bacteria in space. Our experimental  
338 setting has strong implications for realistic scenarios, where an expanding bacterial population  
339 encounters phages and mediates their dispersal. We observed the formation of an asymmetric,  
340 sector-shaped lysis pattern, which cannot be explained by previous models for lysis pattern  
341 formation in phage-bacteria systems. Our new mathematical model successfully reproduced the  
342 experimental observation and revealed the importance of nutrient depletion in maintaining the  
343 geometric asymmetry initialized in the system. Specifically, local nutrient depletion inhibited  
344 phage production and propagation behind the expanding front of the bacterial swim ring, thus  
345 immobilizing the lysis pattern. Without the immobilization effect, the lysis pattern would lose  
346 asymmetry and eventually reduce to a circle, as predicted by the previous models for phage  
347 plaque formation [31-36].

348 Most importantly, straight radial boundaries of the lysis pattern presented a tell-tale sign  
349 that a phage-bacteria system is capable of co-propagation over extended period (Fig 5a).  
350 Therefore, the shape of the lysis pattern can serve as a reporter of co-propagation. The model  
351 further demonstrated that a straightly expanding pattern requires balance between bacterial and

352 phage proliferation efficiency, and bacterial motility and chemotaxis (Figs 3, 4 and S4 Fig). The  
353 balance of biological properties keeps angular expansion of the lysis pattern in pace with its  
354 radial expansion and creates straight radial boundaries in the evolving lysis pattern. In contrast,  
355 the straight boundary is insensitive to extrinsic factors, such as nutrient levels and initial  
356 phage/bacterial numbers (Fig 2, S3 and S6 Figs). Together, these findings suggest that balance of  
357 intrinsic factors supports robust co-propagation of phages and bacteria regardless of variations in  
358 the environment or initial conditions. Interestingly, we experimentally discovered similar  
359 sectorial lysis patterns with straight radial boundaries in two different enteric bacterial species  
360 paired with two different phages (Fig 5b). These lysis patterns implied intrinsic biological  
361 balance between the phages and their bacterial hosts. This phenomenon suggests that natural  
362 pairs of bacteria and phages could have shaped their biological properties to allow robust spatial  
363 coexistence and co-propagation, likely as a result of coevolution. In the future, we will perform  
364 the phage drop assay on other phage-bacteria pairs to examine whether this conclusion may be  
365 generalized universally.

366         The model predictions on extrinsic factors were verified by our experiments (Fig 2). It  
367 was much more complicated, though, to vary the intrinsic biological properties in a controlled  
368 fashion. We are relegating these experimental testing to future work, which will also provide  
369 feedback for model refinement. For example, the predicted lysis pattern only changed  
370 significantly when chemotactic efficiency was increased from the default value (Fig 4a), whereas  
371 a flared-out lysis pattern occurred experimentally in a strain lacking two major chemoreceptors  
372 (S5 Fig). This quantitative discrepancy indicates that the chemotaxis term and/or parameters in  
373 the model should be modified in the future.

374 Our study specifically underscores the importance of co-propagation of phages and  
375 bacteria, i.e., their coexistence in the context of a migrating microbial community. We found that  
376 co-propagation requires not only a balance between the proliferative efficiency of phages and  
377 bacteria, but also between their ability to spread in space (autonomous spreading of bacteria vs.  
378 bacteria-mediated spreading of phages). The requirement of balanced proliferative efficiency is  
379 known to create the selective pressure that drives the evolutionary arms race between phages and  
380 bacteria in their ability to attack and resist attack [10,12,14-16]. Similarly, the requirement of  
381 balanced ability to spread in space could also create a selective pressure to drive an arms race in  
382 evolving stronger ability to spread in space (Fig 5a, dark shaded staircase). For example, the  
383 emergence of flagellotropic phages, i.e., phages specifically targeting actively rotating bacterial  
384 flagella [48], could reflect an evolved strategy for phages to improve their ability to propagate in  
385 space. Interestingly, our model demonstrates a significant impact of chemotactic efficiency on  
386 co-propagation of phages and bacteria (Fig 4 and S6d Fig). Therefore, bacteria could  
387 theoretically evolve higher chemotactic efficiency as a counterattack on phage infection. In the  
388 future we will examine whether the arms race between phages and bacteria indeed affect the  
389 diversity in genes regulating bacterial chemotaxis.

390 Our current work exploited the simplest possible experimental and model setup to  
391 understand how phages and bacteria coexist and co-propagate in space, using lytic phages and  
392 uniform initial nutrient concentration. In the future, we will modify our experimental and model  
393 parameters to investigate additional factors, such as lysogeny and non-uniform nutrient  
394 distribution, on the spatial dynamics of phages and bacteria. We will also incorporate  
395 coevolution between phages and bacteria into our model and experimental set up, to investigate  
396 the long-term co-propagation under the effect of evolution. Findings from this work have strong

397 implications for dispersal of phages in microbial communities and lay the groundwork for future  
 398 applications, such as phage therapy. Ultimately, we hope to create a model that will aid  
 399 successful selection and engineering of phages for targeted applications by providing  
 400 information on phage dispersal and interaction with host bacteria in the corresponding  
 401 environment.

## 402 **Materials and Methods**

403 **Bacterial strains and phages.** The strains of bacteria and phages used are listed in Table  
 404 2.

405 **Table 2:** Biological materials used in this study.

| Species/strains/<br>plasmids                   | Relevant characteristics                                                            | Sources                     | References |
|------------------------------------------------|-------------------------------------------------------------------------------------|-----------------------------|------------|
| <i>Salmonella enterica</i> serovar typhimurium |                                                                                     |                             |            |
| 14028s                                         | Wild type                                                                           | Gift from Rasika M. Harshey |            |
| 14028s Tar <sup>-</sup>                        | <i>tar</i> <sup>-</sup>                                                             | This work                   |            |
| 14028s Tsr <sup>-</sup>                        | <i>tsr</i> <sup>-</sup>                                                             | This work                   |            |
| RH2312/SM20                                    | <i>tar</i> <sup>-</sup> <i>tsr</i> <sup>-</sup>                                     | Gift from Rasika M. Harshey |            |
| TH2788                                         | <i>fliY5221::Tn10dTc</i> (-86 from ATG of <i>fliY</i> )                             | Gift from Kelly T. Hughes   |            |
| <i>Agrobacterium</i> sp. H13-3                 |                                                                                     |                             |            |
| RU12/001                                       | Sm <sup>r</sup> ; spontaneous streptomycin resistant wild-type strain               |                             | [49]       |
| <i>Escherichia coli</i>                        |                                                                                     |                             |            |
| RP437                                          | Wild type                                                                           | Gift from Howard C. Berg    | [50]       |
| AW405                                          | Wild type                                                                           | Gift from Howard C. Berg    | [51]       |
| Phages                                         |                                                                                     |                             |            |
| λ phage                                        | <i>vir</i>                                                                          | Gift from Rüdiger Schmitt   | [52]       |
| χ phage                                        |                                                                                     | Gift from Kelly T. Hughes   |            |
| Plasmid                                        |                                                                                     |                             |            |
| pKD46                                          | <i>bla</i> P <sub>BAD</sub> <i>gam</i> <i>bet</i> <i>exo</i><br>pSC101 <i>oriTS</i> | Gift from Howard C. Berg    | [37]       |

406



407           **Media and growth conditions.** *Salmonella enterica* serovar Typhimurium 14028s was  
408 grown in MSB at 37 °C. MSB is a modified LB medium (1 % tryptone, 0.5 % yeast extract, and  
409 0.5 % NaCl) supplemented with 2 mM MgSO<sub>4</sub> and 2 mM CaCl<sub>2</sub>. *Escherichia coli* strains were  
410 grown at 30 °C in T-broth containing 1 % tryptone and 0.5 % NaCl at 30 °C.

411           **Construction of mutant strains.** The protocol for lambda-Red genetic engineering  
412 [37,38] was followed to make *S. typhimurium* mutant lacking *tar*.

413           **Phage drop assay.** Swim plates containing MSB medium (for *S. Typhimurium*) or T-  
414 broth (for *E. coli*) and 0.3% bacto agar were inoculated with 2.5 µl of a stationary phase bacterial  
415 culture in the center of the plate along with 2.5 µl of phage suspension (MOI = 25.4) at a 1 cm  
416 distance from the inoculation point. A 2.5 µl spot of 0.85% saline was placed at the same  
417 distance from the bacterial inoculation point, opposite from the phage suspension, as a control.  
418 pPlates were incubated at 37 °C (*S. Typhimurium*) or 30 °C (*E. coli*) for 14 hours. All plates  
419 were imaged using the Epson Perfection V370 scanner. Phage drop assays with slight  
420 modifications were conducted to test different variables. For the rod shaped inoculations, sealed  
421 glass capillaries of different lengths were immersed in phage suspension and pressed against the  
422 soft agar at a distance of 0.5 cm from the bacterial inoculation point. To test the effect of varying  
423 inoculation distances, phage suspensions were inoculated at 0.5, 1.0, 1.5, 2.0, and 2.5 cm from  
424 the bacterial inoculation point. For altered nutrient concentration experiments, the initial  
425 concentrations of tryptone and yeast extract were adjusted to be 0.05, 0.1, 0.5, 0.75, or 2.0 times  
426 of the regular nutrient concentration, which is referred to as a concentration of 1. To evaluate the  
427 effect of phage number, the initial phage stock was serially diluted ten-fold and then spotted on  
428 the plate. In experiments conducted with λ phage, the swim plates were supplemented with 10  
429 mM MgSO<sub>4</sub> and 0.2 % maltose.

430           **Phage titer.** Serial dilutions of the phage stock were made and 100  $\mu$ l of each dilution  
431 was added to host bacterial cells with an OD<sub>600</sub> of 1.0. Bacteria-phage mixtures were incubated  
432 for 10 min at room temperature. Each mix received 4 ml of pre-heated 0.5 % soft agar and was  
433 then overlaid on LB plates. Plates were incubated at 37 °C for 4-6 h. The titer of the phage stock  
434 was determined by counting the plaques on the plate that yielded between 30 to 300 plaque  
435 forming units and multiplying the number by the dilution factor.

436            **$\chi$  phage preparation.** Dilutions of phage suspensions mixed with bacteria were plated to  
437 achieve confluent lysis as described in the phage titer protocol using 0.35 % agar for the overlay.  
438 Following formation of plaques, 5 ml of TM buffer (20 mM Tris/HCl [pH=7.5], 10 mM MgSO<sub>4</sub>)  
439 was added to each plate and incubated on a shaking platform at 4 °C for a minimum of 6 h. The  
440 soft agar/buffer mixture was collected, pooled, and bacteria were lysed by adding chloroform to  
441 at final concentration of 0.02 %. Samples were mixed vigorously for 1 min, transferred to glass  
442 tubes, and centrifuged at 10,000 x g for 15 min at room temperature. The supernatant was passed  
443 through a 0.45  $\mu$ m filter and NaCl was added to a final concentration of 4 %. The protocol of  
444 phage preparation was followed as described in [39]. The final phage stock was stored in TM  
445 buffer at 4 °C.

446           **Bacteria and phage quantifications.** Phage drop assays were conducted as described  
447 above. At the 14-hour end point, different areas of the plate were sampled by taking agar plugs  
448 using a 10 ml syringe barrel with plunger. Each agar plug was placed in 1 ml of 0.85 % saline  
449 and incubated at room temperature for 10 min with shaking to allow even mixture of the agar.  
450 Serial dilutions of each sample were plated on LB agar plates and incubated at 37 °C overnight.  
451 For phage quantifications, 100  $\mu$ l of chloroform was added to each sample. The number of phage  
452 particles present in each sample was quantified as described in the phage titer protocol. Densities

453 reported correspond to plaque forming units (for phage) or colony forming units (for bacteria).  
 454 To compare with model results, the volume densities were converted to area densities, based on  
 455 0.5 cm thickness in the agar, i.e., area density ( $\text{cm}^{-2}$ ) = volume density ( $\text{CFU}/\text{cm}^3$  or  $\text{PFU}/\text{cm}^3$ )  $\times$   
 456 0.5 cm.

457 **Model setup.** We constructed a mean-field diffusion-drift-reaction model for the  
 458 bacteria-phage system. Our model includes four variables: density of susceptible bacteria  
 459  $B(x, t)$ , density of infected bacteria  $L(x, t)$ , density of phages  $P(x, t)$ , and nutrient concentration  
 460  $n(x, t)$ . The state variables and parameters are summarized in Table 1. The equations governing  
 461 the spatiotemporal dynamics of bacteria, phages and nutrient read as Eqs. (1) ~ (4).

462 Susceptible bacteria:

$$\begin{aligned} \frac{\partial B}{\partial t} = & \underbrace{D_{Bmax} \nabla \left[ \left( \frac{n}{n + K_c} \right) \nabla B \right]}_{\text{cell diffusion}} - \underbrace{D_{Bmax} \alpha_c \nabla \left[ \frac{K_c}{(n + K_c)^2} B \nabla n \right]}_{\text{cell drift}} \\ & - \underbrace{\eta \frac{K_b}{B + L + K_b} BP}_{\text{phage adsorption}} + \underbrace{g_{max} \frac{n}{n + K_n} B}_{\text{cell division}} \end{aligned} \quad (1)$$

463 Infected bacteria:

$$\begin{aligned} \frac{\partial L}{\partial t} = & \underbrace{D_{Bmax} \nabla \left[ \left( \frac{n}{n + K_c} \right) \nabla L \right]}_{\text{cell diffusion}} - \underbrace{D_{Bmax} \alpha_c \nabla \left[ \frac{K_c}{(n + K_c)^2} L \nabla n \right]}_{\text{cell drift}} \\ & + \underbrace{\eta \frac{K_b}{B + L + K_b} BP}_{\text{phage adsorption}} - \underbrace{k_l Ln}_{\text{cell lysis}} \end{aligned} \quad (2)$$

464 Phages:

$$\frac{\partial P}{\partial t} = \underbrace{D_P \nabla^2 P}_{\text{phage diffusion}} - \underbrace{\eta \frac{K_b}{B + L + K_b} (L + B) P}_{\text{phage multi-adsorption}} + \underbrace{\beta k_l Ln}_{\text{phage bursting}} \quad (3)$$

465 Nutrient:

$$\frac{\partial n}{\partial t} = \underbrace{D_n \nabla^2 n}_{\text{nutrient diffusion}} - \underbrace{\lambda g_{max} \frac{n}{n + K_n} (B + L)}_{\text{nutrient consumption by bacteria}} \quad (4)$$

466 Eqs. (1) ~ (4) incorporate the following model assumptions.

467 (1) The division rate of susceptible bacteria follows the Monod rate law [40].

468 (2) Division of the infected bacteria is neglected because they are likely lysed before  
469 dividing. But they consume nutrients at the same rate as susceptible bacteria (changing this rate  
470 does not affect the qualitative behavior of the model).

471 (3) The phage adsorption rate decreases with increasing bacterial density. This is how  
472 New Assumption (ii) in Results is implemented.

473 (4) Multi-adsorption is considered, i.e., phages can be adsorbed onto bacteria that are  
474 already infected.

475 (5) Because phage assembly requires energy, we assume that the lysis period elongates as  
476 nutrient level decreases. This is how New Assumption (i) in Results is implemented.

477 (6) Because bacterial motility requires energy, it depends on nutrient level. This  
478 dependence is reflected in both the diffusion and chemotaxis terms. Derivation of the diffusion  
479 and chemotaxis terms is given in the Supplementary Materials and S7 Fig. Both susceptible and  
480 infected bacteria follow these spatial dynamics.

481

## 482 **Acknowledgements**

483 We thank Kelly T. Hughes for the gift of  $\chi$  phage, Rüdiger Schmitt for  $\lambda$  phage, Howard C. Berg  
484 for providing us with pKD46 and various *E. coli* strains, Rasika M. Harshey for the gift of the  
485 *Salmonella* strains, and Elizabeth Denson for creating the *Salmonella* typhimurium strain lacking

486 the *tar* gene. We thank Dilara Long for contributing to simulations of an earlier version of the  
487 model.

488

## 489 References

- 490 1 Salmond, G. P. & Fineran, P. C. A century of the phage: past, present and future. *Nat Rev*  
491 *Microbiol* **13**, 777-786, doi:10.1038/nrmicro3564 (2015).
- 492 2 Clokie, M. R., Millard, A. D., Letarov, A. V. & Heaphy, S. Phages in nature.  
493 *Bacteriophage* **1**, 31-45, doi:10.4161/bact.1.1.14942 (2011).
- 494 3 Bergh, O., Borsheim, K. Y., Bratbak, G. & Heldal, M. High abundance of viruses found  
495 in aquatic environments. *Nature* **340**, 467-468, doi:10.1038/340467a0 (1989).
- 496 4 Svircev, A., Roach, D. & Castle, A. Framing the future with bacteriophages in  
497 agriculture. *Viruses* **10**, doi:10.3390/v10050218 (2018).
- 498 5 Chan, B. K., Turner, P. E., Kim, S., Mojibian, H. R., Eleftheriades, J. A. & Narayan, D.  
499 Phage treatment of an aortic graft infected with *Pseudomonas aeruginosa*. *Evol Med*  
500 *Public Health* **2018**, 60-66, doi:10.1093/emph/eoy005 (2018).
- 501 6 Ly-Chatain, M. H. The factors affecting effectiveness of treatment in phages therapy.  
502 *Front Microbiol* **5**, 51, doi:10.3389/fmicb.2014.00051 (2014).
- 503 7 Milo, R., Jorgensen, P., Moran, U., Weber, G. & Springer, M. BioNumbers--the database  
504 of key numbers in molecular and cell biology. *Nucleic Acids Res* **38**, D750-753,  
505 doi:10.1093/nar/gkp889 (2010).
- 506 8 Heilmann, S., Sneppen, K. & Krishna, S. Sustainability of virulence in a phage-bacterial  
507 ecosystem. *J Virol* **84**, 3016-3022, doi:10.1128/JVI.02326-09 (2010).
- 508 9 Heilmann, S., Sneppen, K. & Krishna, S. Coexistence of phage and bacteria on the  
509 boundary of self-organized refuges. *Proc Natl Acad Sci U S A* **109**, 12828-12833,  
510 doi:10.1073/pnas.1200771109 (2012).
- 511 10 Koskella, B. & Brockhurst, M. A. Bacteria-phage coevolution as a driver of ecological  
512 and evolutionary processes in microbial communities. *Fems Microbiology Reviews* **38**,  
513 916-931, doi:10.1111/1574-6976.12072 (2014).
- 514 11 Rodriguez-Valera, F., Martin-Cuadrado, A. B., Rodriguez-Brito, B., Pasic, L., Thingstad,  
515 T. F., Rohwer, F. *et al.* Explaining microbial population genomics through phage  
516 predation. *Nature Reviews Microbiology* **7**, 828-836, doi:10.1038/nrmicro2235 (2009).
- 517 12 Weitz, J. S., Hartman, H. & Levin, S. A. Coevolutionary arms races between bacteria and  
518 bacteriophage. *Proceedings of the National Academy of Sciences of the United States of*  
519 *America* **102**, 9535-9540, doi:10.1073/pnas.0504062102 (2005).
- 520 13 Haerter, J. O., Mitarai, N. & Sneppen, K. Phage and bacteria support mutual diversity in  
521 a narrowing staircase of coexistence. *ISME J* **8**, 2317-2326, doi:10.1038/ismej.2014.80  
522 (2014).
- 523 14 Abedon, S. T. *Bacteriophage Ecology: Population Growth, Evolution, and Impact of*  
524 *Bacterial Viruses*. (Cambridge University Press, 2008).
- 525 15 Wright, R. C. T., Friman, V. P., Smith, M. C. M. & Brockhurst, M. A. Cross-resistance is  
526 modular in bacteria-phage interactions. *Plos Biology* **16**,  
527 doi:10.1371/journal.pbio.2006057 (2018).

- 528 16 Stern, A. & Sorek, R. The phage-host arms race: shaping the evolution of microbes.  
529 *Bioessays* **33**, 43-51, doi:10.1002/bies.201000071 (2011).
- 530 17 Campbell, A. Conditions for existence of bacteriophage. *Evolution* **15**, 153-&, doi:Doi  
531 10.2307/2406076 (1961).
- 532 18 Levin, B. R., Stewart, F. M. & Chao, L. Resource-limited growth, competition, and  
533 predation - a model and experimental studies with bacteria and bacteriophage. *Am Nat*  
534 **111**, 3-24, doi:Doi 10.1086/283134 (1977).
- 535 19 Smith, H. L. & Trevino, R. T. Bacteriophage infection dynamics: multiple host binding  
536 sites. *Math Model Nat Pheno* **4**, 109-134, doi:10.1051/mmnp/20094604 (2009).
- 537 20 Smith, H. L. Models of virulent phage growth with application to phage therapy. *Siam*  
538 *Journal on Applied Mathematics* **68**, 1717-1737, doi:10.1137/070704514 (2008).
- 539 21 Kasman, L. M., Kasman, A., Westwater, C., Dolan, J., Schmidt, M. G. & Norris, J. S.  
540 Overcoming the phage replication threshold: a mathematical model with implications for  
541 phage therapy. *Journal of Virology* **76**, 5557-5564, doi:10.1128/Jvi.76.11.5557-  
542 5564.2002 (2002).
- 543 22 Santos, S. B., Carvalho, C., Azeredo, J. & Ferreira, E. C. Population dynamics of a  
544 Salmonella lytic phage and its host: implications of the host bacterial growth rate in  
545 modelling. *PLoS One* **9**, e102507, doi:10.1371/journal.pone.0102507 (2014).
- 546 23 Beretta, E. & Kuang, Y. Modeling and analysis of a marine bacteriophage infection with  
547 latency period. *Nonlinear Anal-Real* **2**, 35-74, doi:10.1016/S0362-546x(99)00285-0  
548 (2001).
- 549 24 Schrag, S. J. & Mittler, J. E. Host-parasite coexistence: The role of spatial refuges in  
550 stabilizing bacteria-phage interactions. *Am Nat* **148**, 348-377, doi:Doi 10.1086/285929  
551 (1996).
- 552 25 Brockhurst, M. A., Buckling, A. & Rainey, P. B. Spatial heterogeneity and the stability of  
553 host-parasite coexistence. *J Evol Biol* **19**, 374-379, doi:10.1111/j.1420-  
554 9101.2005.01026.x (2006).
- 555 26 Kerr, B., Neuhauser, C., Bohannan, B. J. & Dean, A. M. Local migration promotes  
556 competitive restraint in a host-pathogen 'tragedy of the commons'. *Nature* **442**, 75-78,  
557 doi:10.1038/nature04864 (2006).
- 558 27 Abedon, S. T., Kuhl, S. J., Blasdel, B. G. & Kutter, E. M. Phage treatment of human  
559 infections. *Bacteriophage* **1**, 66-85, doi:10.4161/bact.1.2.15845 (2011).
- 560 28 Chan, B. K. & Abedon, S. T. Bacteriophages and their enzymes in biofilm control. *Curr*  
561 *Pharm Design* **21**, 85-99 (2015).
- 562 29 Simmons, M., Drescher, K., Nadell, C. D. & Bucci, V. Phage mobility is a core  
563 determinant of phage-bacteria coexistence in biofilms. *Isme Journal* **12**, 532-543,  
564 doi:10.1038/ismej.2017.190 (2018).
- 565 30 Wolfe, A. J. & Berg, H. C. Migration of bacteria in semisolid agar. *Proc Natl Acad Sci U*  
566 *S A* **86**, 6973-6977 (1989).
- 567 31 Mitarai, N., Brown, S. & Sneppen, K. Population dynamics of phage and bacteria in  
568 spatially structured habitats using phage lambda and *Escherichia coli*. *J Bacteriol* **198**,  
569 1783-1793, doi:10.1128/JB.00965-15 (2016).
- 570 32 Fort, J. A comment on amplification and spread of viruses in a growing plaque. *J Theor*  
571 *Biol* **214**, 515-518, doi:10.1006/jtbi.2001.2469 (2002).
- 572 33 You, L. & Yin, J. Amplification and spread of viruses in a growing plaque. *J Theor Biol*  
573 **200**, 365-373, doi:10.1006/jtbi.1999.1001 (1999).

- 574 34 Yin, J. & McCaskill, J. S. Replication of viruses in a growing plaque: a reaction-diffusion  
575 model. *Biophys J* **61**, 1540-1549, doi:10.1016/S0006-3495(92)81958-6 (1992).
- 576 35 Gourley, S. A. & Kuang, Y. A delay reaction-diffusion model of the spread of  
577 bacteriophage infection. *Siam Journal on Applied Mathematics* **65**, 550-566,  
578 doi:10.1137/S0036139903436613 (2005).
- 579 36 Jones, D. A. & Smith, H. L. Bacteriophage and bacteria in a flow reactor. *Bulletin of*  
580 *Mathematical Biology* **73**, 2357-2383, doi:10.1007/s11538-010-9626-0 (2011).
- 581 37 Datsenko, K. A. & Wanner, B. L. One-step inactivation of chromosomal genes in  
582 *Escherichia coli* K-12 using PCR products. *Proceedings of the National Academy of*  
583 *Sciences of the United States of America* **97**, 6640-6645, doi:DOI  
584 10.1073/pnas.120163297 (2000).
- 585 38 Karlinsey, J. E. Lambda-red genetic engineering in *Salmonella enterica* serovar  
586 typhimurium. *Advanced Bacterial Genetics: Use of Transposons and Phage for Genomic*  
587 *Engineering* **421**, 199-209, doi:10.1016/S0076-6879(06)21016-4 (2007).
- 588 39 Gonzalez, F., Helm, R. F., Broadway, K. M. & Scharf, B. E. More than rotating flagella:  
589 Lipopolysaccharide as a secondary receptor for flagellotropic phage 7-7-1. *Journal of*  
590 *Bacteriology* **200**, doi:10.1128/JB.00363-18 (2018).
- 591 40 Monod, J. The growth of bacterial cultures. *Annual Review of Microbiology* **3**, 371-394,  
592 doi:DOI 10.1146/annurev.mi.03.100149.002103 (1949).
- 593 41 Yen, J. Y., Broadway, K. M. & Scharf, B. E. Minimum requirements of flagellation and  
594 motility for infection of *Agrobacterium* sp. strain H13-3 by flagellotropic bacteriophage  
595 7-7-1. *Appl Environ Microbiol* **78**, 7216-7222, doi:10.1128/AEM.01082-12 (2012).
- 596 42 Adler, J. Chemotaxis in bacteria. *Science* **153**, 708-&, doi:DOI  
597 10.1126/science.153.3737.708 (1966).
- 598 43 Hoyland-Kroghsbo, N. M., Maerkedahl, R. B. & Lo Svenningsen, S. A quorum-sensing-  
599 induced bacteriophage defense mechanism. *Mbio* **4**, doi:10.1128/mBio.00362-12 (2013).
- 600 44 Patteson, A. E., Gopinath, A., Goulian, M. & Arratia, P. E. Running and tumbling with *E.*  
601 *coli* in polymeric solutions. *Scientific reports* **5**, 15761, doi:10.1038/srep15761 (2015).
- 602 45 Schade, S. Z., Adler, J. & Ris, H. How bacteriophage chi attacks motile bacteria. *J Virol*  
603 **1**, 599-609 (1967).
- 604 46 Meynell, E. W. A phage, phi-chi, which attacks motile bacteria. *Journal of General*  
605 *Microbiology* **25**, 253-& (1961).
- 606 47 Samuel, A. D. T., Pitta, T. P., Ryu, W. S., Danese, P. N., Leung, E. C. W. & Berg, H. C.  
607 Flagellar determinants of bacterial sensitivity to chi-phage. *Proceedings of the National*  
608 *Academy of Sciences of the United States of America* **96**, 9863-9866, doi:DOI  
609 10.1073/pnas.96.17.9863 (1999).
- 610 48 Chaturongakul, S. & Ounjai, P. Phage-host interplay: examples from tailed phages and  
611 Gram-negative bacterial pathogens. *Front Microbiol* **5**, 442,  
612 doi:10.3389/fmicb.2014.00442 (2014).
- 613 49 Scharf, B., Schuster-Wolff-Buhring, H., Rachel, R. & Schmitt, R. Mutational analysis of  
614 the *Rhizobium lupini* H13-3 and *Sinorhizobium meliloti* flagellin genes: importance of  
615 flagellin A for flagellar filament structure and transcriptional regulation. *J Bacteriol* **183**,  
616 5334-5342 (2001).
- 617 50 Parkinson, J. S. Complementation analysis and deletion mapping of *Escherichia coli*  
618 mutants defective in chemotaxis. *J Bacteriol* **135**, 45-53 (1978).

- 619 51 Armstrong, J. B., Adler, J. & Dahl, M. M. Nonchemotactic mutants of *Escherichia coli*. *J*  
620 *Bacteriol* **93**, 390-398 (1967).
- 621 52 Jacob, F. & Wollman, E. L. Etude genetique d'un bacteriophage tempere d'*Escherichia*  
622 *coli*. III. Effet du rayonnement ultraviolet sur la recombinaison genetique. *Annales de*  
623 *l'Institut Pasteur* **88**, 724-749 (1955).
- 624 53 Swiecicki, J. M., Sliusarenko, O. & Weibel, D. B. From swimming to swarming:  
625 *Escherichia coli* cell motility in two-dimensions. *Integr Biol (Camb)* **5**, 1490-1494,  
626 doi:10.1039/c3ib40130h (2013).
- 627 54 Ma, Y. G., Zhu, C. Y., Ma, P. S. & Yu, K. T. Studies on the diffusion coefficients of  
628 amino acids in aqueous solutions. *J Chem Eng Data* **50**, 1192-1196,  
629 doi:10.1021/je049582g (2005).
- 630 55 Gallet, R., Kannoly, S. & Wang, I. N. Effects of bacteriophage traits on plaque formation.  
631 *Bmc Microbiology* **11**, doi:10.1186/1471-2180-11-181 (2011).
- 632 56 Shao, Y. & Wang, I. N. Bacteriophage adsorption rate and optimal lysis time. *Genetics*  
633 **180**, 471-482, doi:10.1534/genetics.108.090100 (2008).
- 634 57 Shao, Y. & Wang, I. N. Effect of late promoter activity on bacteriophage lambda fitness.  
635 *Genetics* **181**, 1467-1475, doi:10.1534/genetics.108.098624 (2009).
- 636 58 De Paepe, M. & Taddei, F. Viruses' life history: towards a mechanistic basis of a trade-  
637 off between survival and reproduction among phages. *PLoS Biol* **4**, e193,  
638 doi:10.1371/journal.pbio.0040193 (2006).
- 639



## **Supplementary Materials**

### **Formation of Phage Lysis Patterns and Implications on Co-Propagation of Phages and Motile Host Bacteria**

Xiaochu Li, Floricel Gonzalez, Nathaniel Esteves, Birgit E. Scharf, Jing Chen

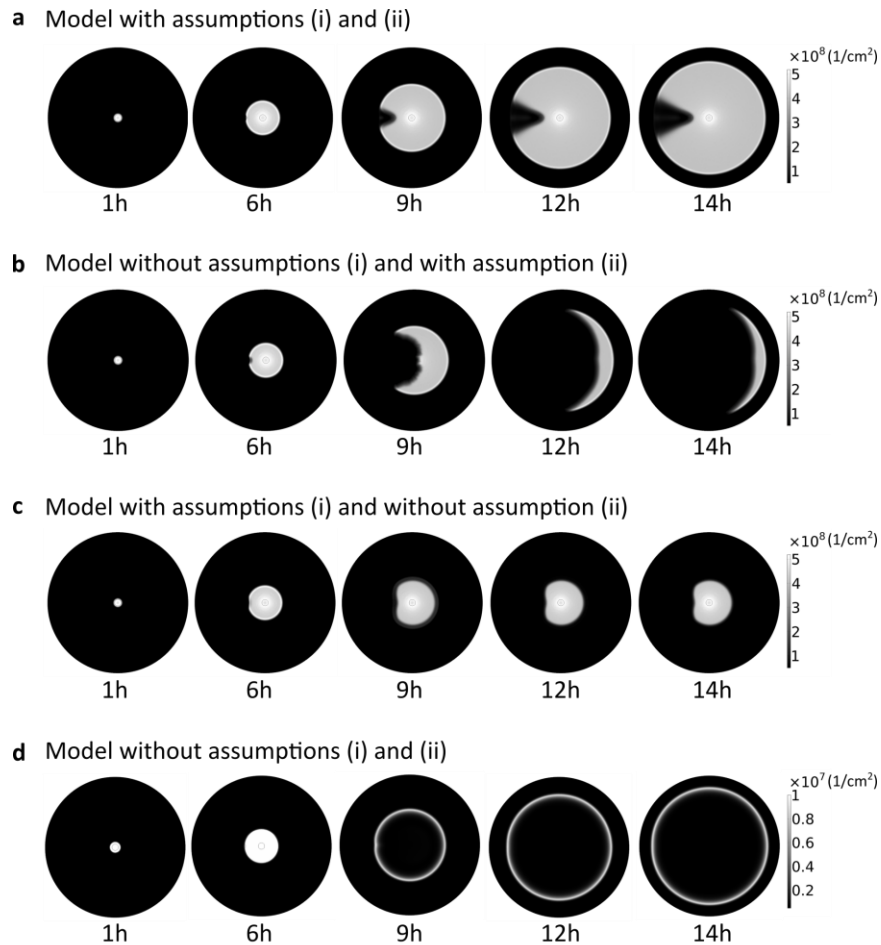

Assumption(i): the lysis period elongates as nutrient level decreases.

Assumption(ii): the phage adsorption rate decreases with increasing bacterial density.

**S1 Fig. Both direct and indirect negative dependences of phage proliferation on bacterial density are necessary for generating straight radial boundaries in the lysis pattern.** (a) Simulated lysis pattern formation with both Assumptions (i) and (ii). Same results as Fig. 1b, second row. (b) Simulated lysis pattern formation without Assumption (i), but with Assumption (ii). (c) Simulated lysis pattern formation without Assumption (ii), but with Assumption (i). (d) Simulated lysis pattern formation without both Assumptions. As described in Results, Assumption (i) states that nutrient deficiency inhibits phage replication, and Assumption (ii) states that high bacterial density inhibits phage production.

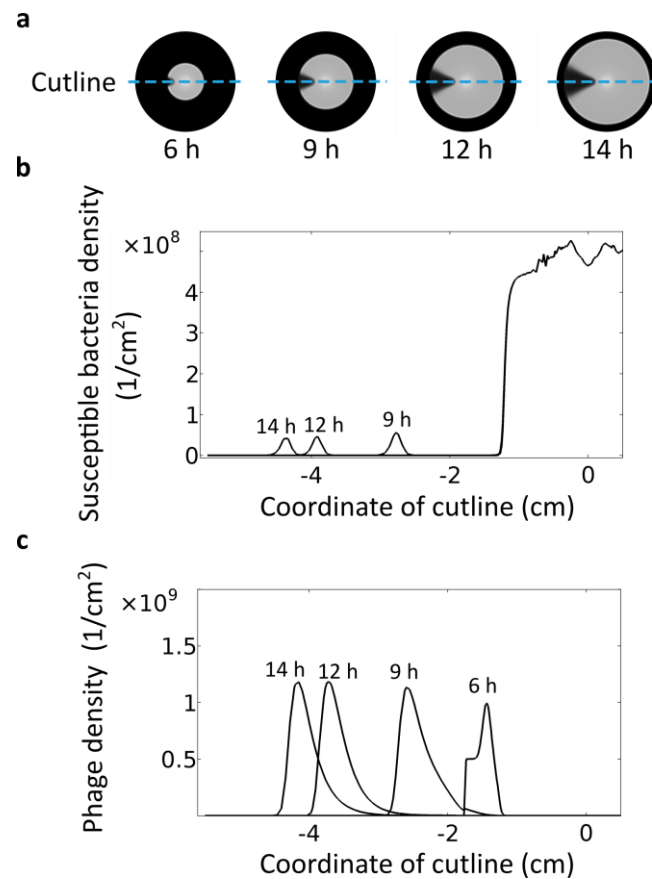

**S2 Fig. Model results show steady bacteria and phage densities at the expanding front after the phage initiation zone emerges.** (a) Lysis patterns over time. Blue dashed line: cutline over which the density profiles are plotted in (b). (b) Density profiles of susceptible bacteria over the cutline at the labeled times. (c) Density profiles of phages over the cutline at the labeled times.

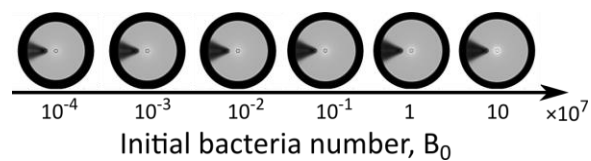

**S3 Fig. Simulation results with various numbers of inoculated bacteria.**

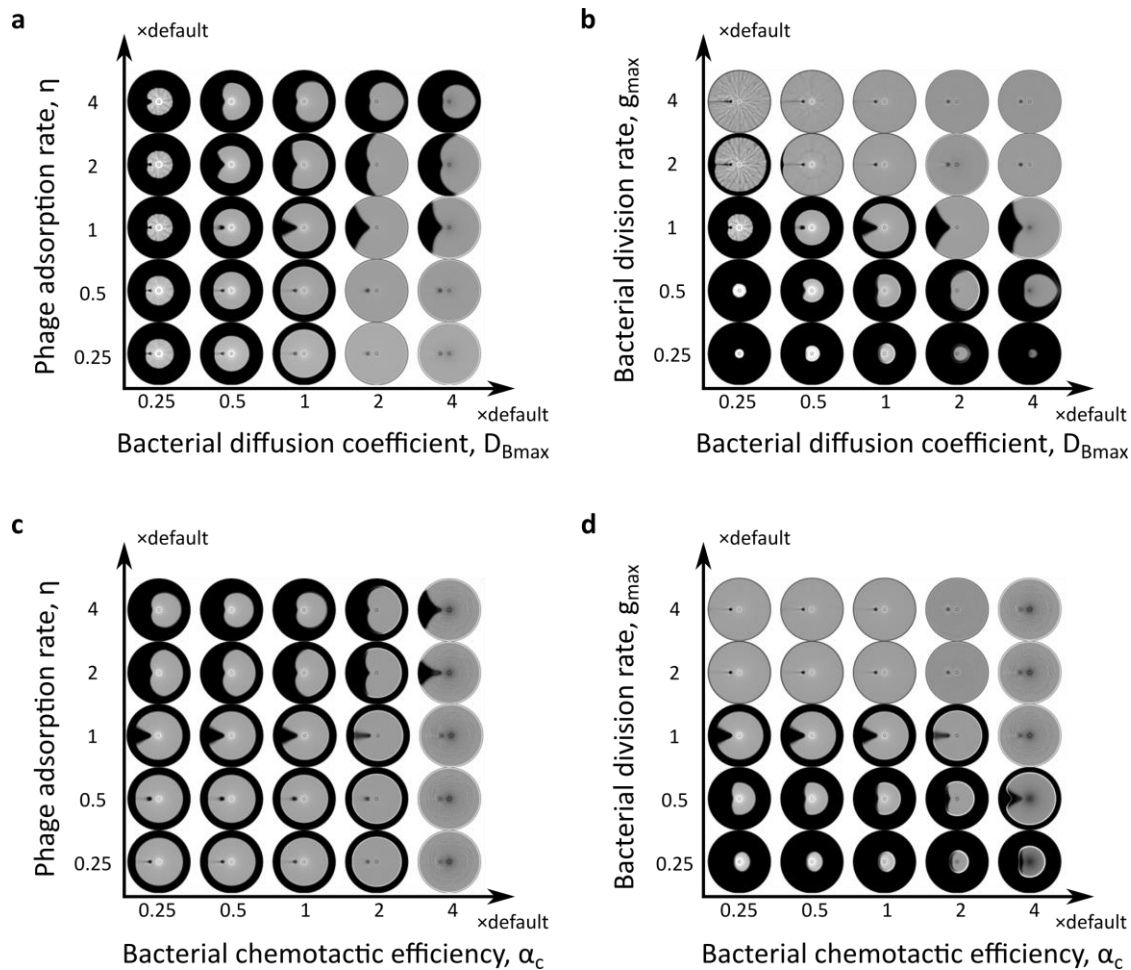

**S4 Fig. Lysis pattern with straight radial boundaries requires balance between intrinsic properties of bacteria and phage.** Simulated lysis patterns with (a) various phage adsorption rate constants and bacterial diffusion coefficients, (b) various bacterial division rate constants and bacterial diffusion coefficients, (c) various phage adsorption rate constants and chemotactic efficiencies, and (d) various bacterial division rate constants and chemotactic efficiencies.

Exp.

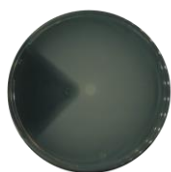

Deletion:  $\Delta$ Tar

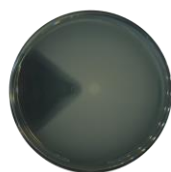

Deletion:  $\Delta$ Tsr

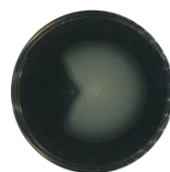

Deletion:  $\Delta$ Tar  $\Delta$ Tsr

**S5 Fig. Experimental results of *S. Typhimurium* strains lacking chemoreceptors.**

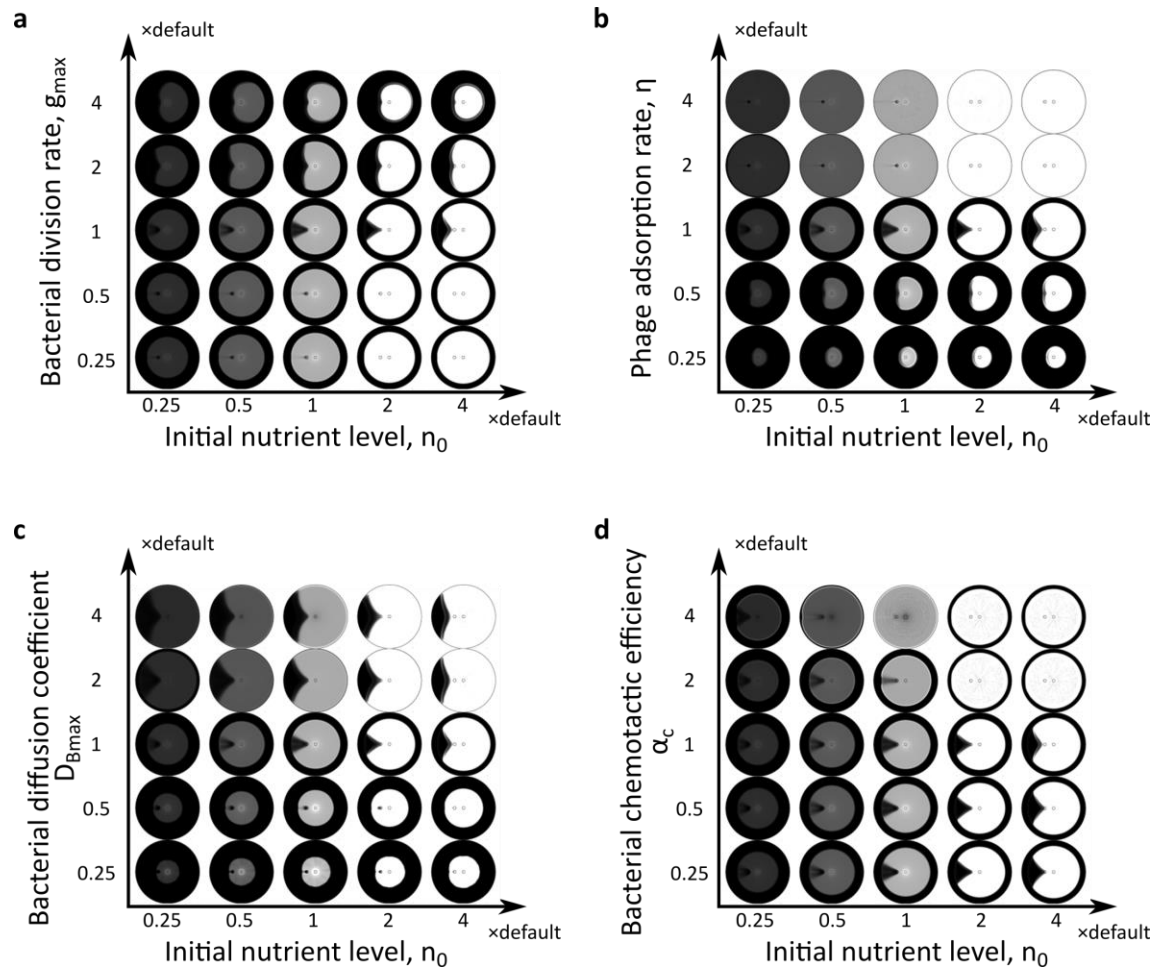

**S6 Fig. The shape of lysis area depends on the competition between phages and bacteria, but not the initial nutrient level.** Simulated lysis patterns with various initial nutrient levels and (a) bacterial division rate constants, (b) phage adsorption rate constants, (c) bacterial diffusion coefficients, (d) chemotactic efficiencies.

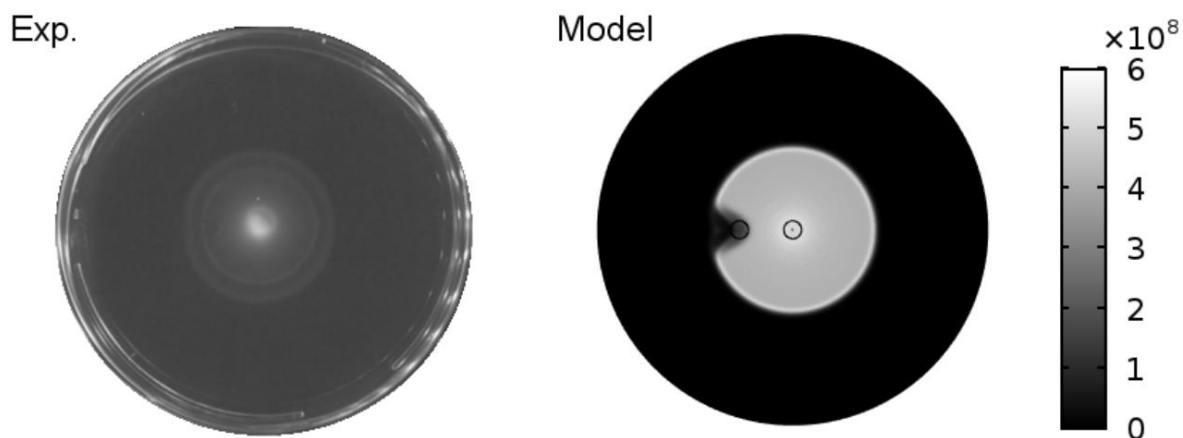

**S1 Movie. Time evolution of the lysis pattern in experiment and model.** Each frame displays corresponding time points in experiment vs. model. Total time 14 hrs. Color bar represents density of bacteria ( $\text{cm}^{-2}$ ) in model.



## Mean field model for bacterial diffusion and chemotaxis with nutrient dependent motility

Here we derive the mean-field diffusion and chemotaxis terms, following the original work by Keller and Segel [1]. Specifically our model incorporates a nonlinear dependence of bacterial motility on nutrient level (as bacteria require energy to move). Note that both the diffusion and chemotaxis flux terms result from the run-and-tumble process of the bacteria; hence any regulation of bacterial motility or tumbling would affect both terms. Our derivation below emphasizes such quantitative relation between the diffusion and chemotaxis fluxes. For simplicity we derive the flux terms in 1D space, and the result can be readily generalized to 2D space. Our derivation is based on the following assumptions.

(1) The bacterium takes left or right steps of length  $\Delta$ .

(2) The original paper by Keller and Segel assumes that the average frequency of steps to the left is governed by the mean nutrient concentration at the left edge, and vice versa [1]. Hence the difference in nutrient concentration across the cell body length governs the chemotaxis flux. This gradient sensing mode, however, differs from the temporal mode exploited by real bacteria [2]. Instead of detecting the difference of nutrient concentration at two ends of the cell (which is too small for reliable gradient detection in a tiny bacterial cell), the bacterial chemoreceptors use molecular memory to detect the temporal increase or decrease of nutrient signals as the bacterium swims [3]. However, note that the cell body length pictured in Keller and Segel's original derivation essentially reflects the distance over which nutrient gradient is detected. Therefore, if we simply generalize the cell body to a "gradient-sensing distance", the same derivation will apply to the temporal mode of gradient sensing (Fig. S7). In the temporal mode, the gradient-sensing distance reflects the distance a bacterium swims in the characteristic time of chemoreceptor memory.

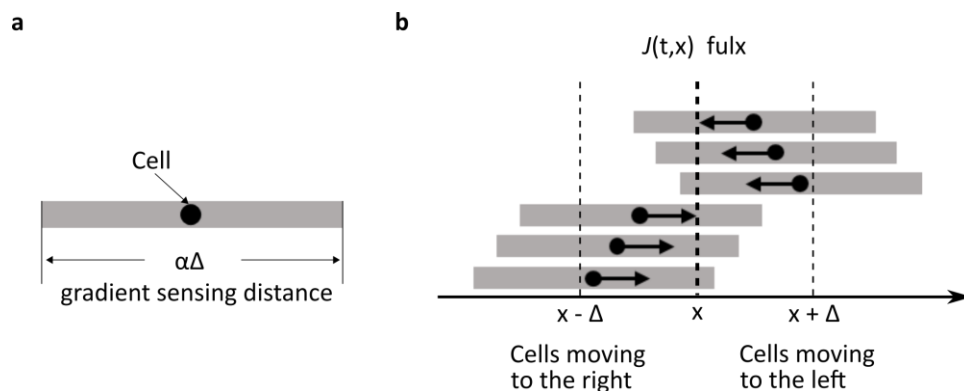

**S7 Fig. Spatial flux of bacteria.** (a) Generalization of cell body length in the Keller-Segel derivation to gradient-sensing distance. (b) Illustration of the bacterial flux through a spatial location  $x$ . The flux of right-moving cells (lower batch) passing through the location  $x$  in a single step is the integration of the product of the step frequency to the right and cell density over the interval  $[x - \Delta, x]$  (first integration term in Eq. (S1)). Vice versa, the flux of left-moving cells (upper batch) going through the location  $x$  in a single step is the integration of the product of the step frequency to the left and cell density over the interval  $[x, x + \Delta]$  (second integration term in Eq. (S1)).

Let  $B(t, x)$  denote bacterial density at time  $t$  and location  $x$ . Let  $f(n)$  denote the average frequency of steps in a given direction, which is dependent on the local nutrient concentration,  $n(t, x)$ .  $\alpha$  is the ratio of the gradient-sensing distance to the step size. For a bacterium centered at location  $x$ , its frequencies of steps to the right and left, according to the 2nd assumption above, depend on the nutrient level at the right and left end of the gradient-sensing distance, i.e., written as  $f[n(t, x + \frac{1}{2}\alpha\Delta)]$  and  $f[n(t, x - \frac{1}{2}\alpha\Delta)]$ , respectively. The net flux of bacteria  $J(t, x)$  at time  $t$  and location  $x$  (Fig. S9b) is defined by the amount of bacteria per unit time moving to the right minus the amount of bacteria per unit time moving to the left [1] (Eq.(S1)).

$$J(t, x) = \int_{x-\Delta}^x f \left[ n(t, s + \frac{1}{2}\alpha\Delta) \right] B(t, s) ds - \int_x^{x+\Delta} f \left[ n(t, s - \frac{1}{2}\alpha\Delta) \right] B(t, s) ds \quad (S1)$$

Note that when the step length  $\Delta$  is sufficiently small, we can approximate the flux term up to  $O(\Delta^2)$ , as shown in Eqs.(S2) and (S3).

$$\begin{aligned} \int_{x-\Delta}^x f \left[ n(t, s + \frac{1}{2}\alpha\Delta) \right] B(t, s) ds \\ \approx f[n(t, x)]B(t, x)\Delta - \frac{f(t, x)\partial_x B(t, x)}{2}\Delta^2 \\ + \frac{f'[n(t, x)]\partial_x n(t, x)B(t, x)}{2}[\Delta x + \Delta^2(\alpha - 1)] \end{aligned} \quad (S2)$$

$$\begin{aligned} \int_x^{x+\Delta} f \left[ n(t, s - \frac{1}{2}\alpha\Delta) \right] B(t, s) ds \\ \approx f[n(t, x)]b(t, x)\Delta + \frac{f(t, x)\partial_x B(t, x)}{2}\Delta^2 \\ - \frac{f'[n(t, x)]\partial_x n(t, x)B(t, x)}{2}[-\Delta x + \Delta^2(\alpha - 1)] \end{aligned} \quad (S3)$$

Plugging Eqs.(S2) and (S3) into Eq.(S1) yields

$$J(t, x) = -\Delta^2 f(n)\partial_x B(t, x) + (\alpha - 1)\Delta^2 f'(n)\partial_x n(t, x)B(t, x) \quad (S4)$$

The first term describes diffusion (random motion) of the cells, and the second one describes the chemotaxis (biased motion up the nutrient gradient).

Because bacteria require energy to move, the cell velocity is likely an increasing function of nutrient level with a maximum value. We assumed a Michaelis-Menten type relation between nutrient level and cell velocity. Because  $f(n)$  is proportional to the cell velocity, it is also a Michaelis-Menten function of nutrient level (Eq. (S5)).

$$f = \frac{n}{n + K_c} \quad (S5)$$

where  $K_c$  is the nutrient level that allows half maximum cell velocity.

From Eq.(S4), we obtain the effective diffusion coefficient as a function of local nutrient level (Eq.(S6)).

$$D_B(n) \equiv \Delta^2 f(n) = D_{Bmax} \frac{n}{n + K_c} \quad (\text{S6})$$

where the maximum diffusion coefficient,  $D_{Bmax}$ , reflects maximum bacterial motility.

From Eq.(S4) we also obtain the chemotactic coefficient  $\chi(n)$  (Eq.(S7)).

$$\chi(n) = (\alpha - 1)\Delta^2 f'(n) \quad (\text{S7})$$

which can be rewritten as

$$\chi(n) = \alpha_c D_{Bmax} \frac{K_c}{(n + K_c)^2} \quad (\text{S8})$$

where  $\alpha_c = \alpha - 1$  represents the chemotactic efficiency. Note that the chemotactic coefficient given in Eq.(S8) is similar to that in the classic Keller-Segel models [4]. However, instead of representing a saturated chemotactic response, the fraction term in Eq.(S8) represents the saturation of cell velocity, with increasing nutrient level, as a related fraction term also appears in the diffusion flux (Eq.(S6)).

The overall spatial flux of bacteria in 2D space, including random motion and chemotaxis process, is derived by replacing the 1D spatial derivative,  $\partial_x$ , by the 2D gradient operator,  $\nabla = [\partial_x, \partial_y]$  (Eq.S(9)).

$$J_B = -D_B(n)\nabla b + \chi(n)b\nabla n \quad (\text{S9})$$

## Supplementary References

1. Keller EF, Segel LA. Model for chemotaxis. *J Theor Biol.* 1971;30(2):225-34.
2. Vladimirov N, Sourjik V. Chemotaxis: how bacteria use memory. *Biol Chem.* 2009; 390(11):1097-104.
3. Wadhams GH, Armitage JP. Making sense of it all: bacterial chemotaxis. *Nat Rev Mol Cell Biol.* 2004;5(12):1024-37.
4. Lapidus IR, Schiller R. Model for the chemotactic response of a bacterial population. *Biophys J.* 1976;16(7):779-89.
